# Supplementary material
Source: Springer Nature journal article supplement (https://www.springermedizin.de/resource/supplementary/12943_2013_1112_MOESM6_ESM.pdf/9552520)

**A****15e 5 $\mu$ M****ATRA 5 $\mu$ M**

NT 5' 15' 60' 5' 15' 60' (min)

WB:

Pull  
Down

Rac-GTP

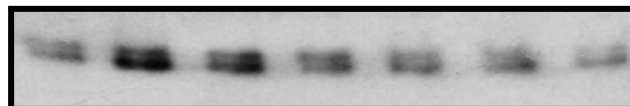

Rac

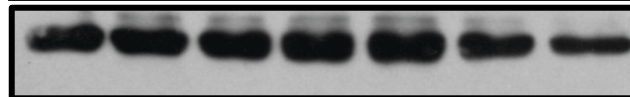

p-Akt

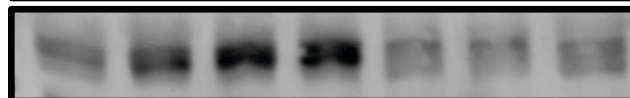

Akt

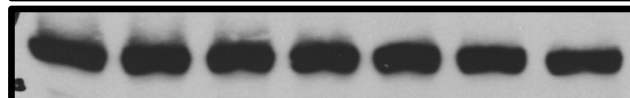

actin

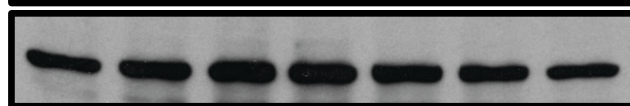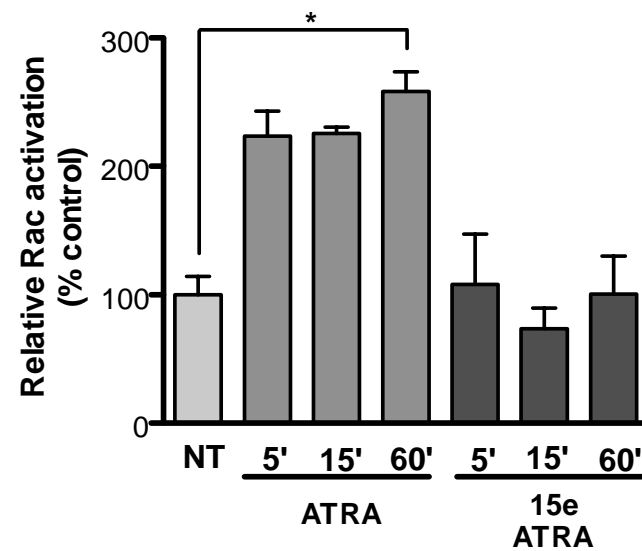**B**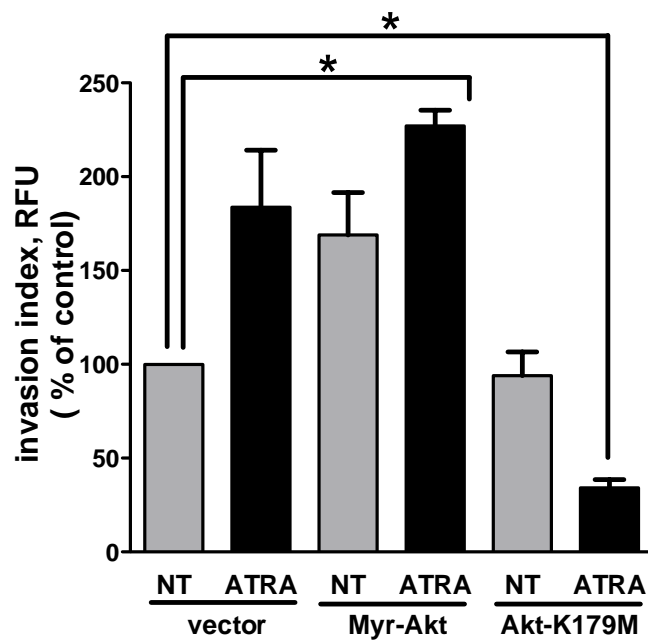

Supplement: MOESM6 [file 9552520]
